# Supplementary material for: Long-Read–Based de novo Genome Assembly and Comparative Genomics of the Wheat Leaf Rust Pathogen Puccinia triticina Identifies Candidates for Three Avirulence Genes
Source: Front Genet. 2020 Jun 4;11:521. doi: 10.3389/fgene.2020.00521 (PMC7287177; doi:10.3389/fgene.2020.00521)
Supplement: TABLE S7 — Orthologs between Pt104 and Pt race1 genomes. [file Table_7.XLSX]

## Sheet: Pt104_Race1_orthologs
Pt104_gene	Race1_ortholog
GN104ID162_025740	PTTG_00001
GN104ID162_017289	PTTG_00002
GN104ID162_017297	PTTG_00005
GN104ID162_017299	PTTG_00006
GN104ID162_017301	PTTG_00007
GN104ID162_017303	PTTG_00008
GN104ID162_017324	PTTG_00015
GN104ID162_017337	PTTG_00016
GN104ID162_017341	PTTG_00017
GN104ID162_017343	PTTG_00018
GN104ID162_017354	PTTG_00021
GN104ID162_017366	PTTG_00024
GN104ID162_017369	PTTG_00026
GN104ID162_017372	PTTG_00027
GN104ID162_017373	PTTG_00028
GN104ID162_017374	PTTG_00029
GN104ID162_017375	PTTG_00030
GN104ID162_017382	PTTG_00032
GN104ID162_017391	PTTG_00035
GN104ID162_017392,GN104ID162_028354	PTTG_00036,PTTG_05171
GN104ID162_017394	PTTG_00037
GN104ID162_017395	PTTG_00039,PTTG_00039T1
GN104ID162_017397	PTTG_00040
GN104ID162_017400	PTTG_00041
GN104ID162_017401	PTTG_00042
GN104ID162_017410	PTTG_00043
GN104ID162_017415,GN104ID162_025673	PTTG_00045
GN104ID162_017416,GN104ID162_025672	PTTG_00046
GN104ID162_017417,GN104ID162_025671	PTTG_00047
GN104ID162_017418,GN104ID162_025669	PTTG_00048,PTTG_00048T1
GN104ID162_017420,GN104ID162_025666	PTTG_00049
GN104ID162_017425,GN104ID162_025661	PTTG_00050
GN104ID162_017434,GN104ID162_025654	PTTG_00053
GN104ID162_017441,GN104ID162_025621	PTTG_00054
GN104ID162_017442,GN104ID162_025622	PTTG_00055
GN104ID162_001448	PTTG_00056
GN104ID162_001447	PTTG_00057
GN104ID162_001439	PTTG_00060
GN104ID162_001438	PTTG_00061
GN104ID162_001435	PTTG_00062
GN104ID162_001433	PTTG_00063,PTTG_00063T1
GN104ID162_001431	PTTG_00064
GN104ID162_001430	PTTG_00065
GN104ID162_022808,GN104ID162_023629	PTTG_00068
GN104ID162_001399	PTTG_00075
GN104ID162_001391	PTTG_00077
GN104ID162_001388	PTTG_00078
GN104ID162_001387	PTTG_00079
GN104ID162_001384	PTTG_00080
GN104ID162_001383	PTTG_00081
GN104ID162_001380	PTTG_00082
GN104ID162_001379	PTTG_00083
GN104ID162_001374	PTTG_00085
GN104ID162_001372	PTTG_00086
GN104ID162_001361	PTTG_00089
GN104ID162_001357	PTTG_00090
GN104ID162_001356	PTTG_00091
GN104ID162_001351	PTTG_00093
GN104ID162_001349	PTTG_00094
GN104ID162_001346	PTTG_00096
GN104ID162_001344	PTTG_00097
GN104ID162_001338	PTTG_00099
GN104ID162_001337	PTTG_00100
GN104ID162_001336	PTTG_00101
GN104ID162_001334	PTTG_00102
GN104ID162_001328	PTTG_00106
GN104ID162_001326	PTTG_00107
GN104ID162_001322	PTTG_00108
GN104ID162_001321	PTTG_00109
GN104ID162_001313	PTTG_00111
GN104ID162_024694	PTTG_00113
GN104ID162_024693	PTTG_00114
GN104ID162_024692	PTTG_00115
GN104ID162_024690	PTTG_00116
GN104ID162_023252	PTTG_00119
GN104ID162_024681	PTTG_00121
GN104ID162_024677	PTTG_00122
GN104ID162_013042	PTTG_00123
GN104ID162_024664	PTTG_00125
GN104ID162_024662	PTTG_00126T1
GN104ID162_015729	PTTG_00127
GN104ID162_015726	PTTG_00128
GN104ID162_024652	PTTG_00131
GN104ID162_024651	PTTG_00132,PTTG_00132T1
GN104ID162_024649	PTTG_00133
GN104ID162_024641	PTTG_00138
GN104ID162_024635	PTTG_00140
GN104ID162_024632	PTTG_00142
GN104ID162_017125,GN104ID162_024626	PTTG_00143
GN104ID162_024620	PTTG_00145
GN104ID162_017108,GN104ID162_024610	PTTG_00147T1
GN104ID162_017105,GN104ID162_024607	PTTG_00149
GN104ID162_017104,GN104ID162_024606	PTTG_00150
GN104ID162_017095	PTTG_00152,PTTG_00152T1
GN104ID162_024802	PTTG_00155
GN104ID162_024803	PTTG_00156
GN104ID162_017090	PTTG_00157
GN104ID162_017080	PTTG_00162
GN104ID162_017079	PTTG_00163
GN104ID162_017077	PTTG_00164
GN104ID162_017075	PTTG_00165
GN104ID162_017074	PTTG_00166
GN104ID162_017071	PTTG_00167
GN104ID162_010347	PTTG_00168
GN104ID162_017069	PTTG_00169
GN104ID162_017061	PTTG_00172
GN104ID162_017059	PTTG_00173
GN104ID162_017056	PTTG_00174
GN104ID162_017055	PTTG_00175
GN104ID162_017039	PTTG_00180
GN104ID162_017037	PTTG_00181
GN104ID162_017027	PTTG_00184
GN104ID162_017025	PTTG_00185
GN104ID162_017024	PTTG_00186
GN104ID162_017022	PTTG_00187
GN104ID162_017021	PTTG_00188
GN104ID162_017019	PTTG_00189
GN104ID162_017011	PTTG_00194
GN104ID162_017009	PTTG_00195
GN104ID162_007732	PTTG_00199
GN104ID162_007733	PTTG_00200
GN104ID162_007734	PTTG_00201
GN104ID162_007737	PTTG_00202
GN104ID162_007738	PTTG_00203
GN104ID162_007739	PTTG_00204
GN104ID162_007742	PTTG_00206
GN104ID162_007748	PTTG_00207
GN104ID162_007753	PTTG_00208
GN104ID162_007754	PTTG_00209
GN104ID162_007759	PTTG_00211
GN104ID162_007761	PTTG_00212
GN104ID162_007763	PTTG_00213
GN104ID162_007765	PTTG_00214
GN104ID162_007766	PTTG_00215
GN104ID162_007768	PTTG_00216
GN104ID162_007771	PTTG_00221
GN104ID162_007777	PTTG_00225
GN104ID162_007779	PTTG_00226
GN104ID162_007780	PTTG_00227
GN104ID162_005465	PTTG_00230
GN104ID162_005438	PTTG_00243
GN104ID162_019339	PTTG_00248
GN104ID162_019344	PTTG_00250
GN104ID162_002093	PTTG_00253
GN104ID162_002094	PTTG_00254
GN104ID162_002099	PTTG_00256
GN104ID162_002119	PTTG_00263
GN104ID162_002150	PTTG_00273
GN104ID162_002153	PTTG_00274
GN104ID162_002157	PTTG_00275
GN104ID162_002159	PTTG_00276
GN104ID162_002162	PTTG_00277
GN104ID162_002164	PTTG_00278
GN104ID162_002174	PTTG_00284
GN104ID162_002179	PTTG_00285
GN104ID162_002195	PTTG_00286
GN104ID162_002207	PTTG_00290
GN104ID162_002211	PTTG_00291
GN104ID162_002217	PTTG_00292
GN104ID162_002220	PTTG_00293
GN104ID162_002222	PTTG_00294
GN104ID162_002223	PTTG_00295
GN104ID162_002226	PTTG_00297
GN104ID162_002227	PTTG_00298
GN104ID162_002230	PTTG_00300
GN104ID162_002233	PTTG_00301
GN104ID162_002244	PTTG_00304
GN104ID162_002246	PTTG_00305,PTTG_00305T1
GN104ID162_002249	PTTG_00306
GN104ID162_002252	PTTG_00307
GN104ID162_002253	PTTG_00308
GN104ID162_002255	PTTG_00309
GN104ID162_002258	PTTG_00310
GN104ID162_002265	PTTG_00312
GN104ID162_002266	PTTG_00313
GN104ID162_002269	PTTG_00315
GN104ID162_002272	PTTG_00316
GN104ID162_002273	PTTG_00317
GN104ID162_002281	PTTG_00322
GN104ID162_002282	PTTG_00323
GN104ID162_002284	PTTG_00324
GN104ID162_002285	PTTG_00325
GN104ID162_002287	PTTG_00326
GN104ID162_002291	PTTG_00327
GN104ID162_002293	PTTG_00328
GN104ID162_002294	PTTG_00329
GN104ID162_002300	PTTG_00330
GN104ID162_002301	PTTG_00331
GN104ID162_002302	PTTG_00332
GN104ID162_002307	PTTG_00333
GN104ID162_002310	PTTG_00336
GN104ID162_002312	PTTG_00338
GN104ID162_002316	PTTG_00341
GN104ID162_002317	PTTG_00342
GN104ID162_002318	PTTG_00343
GN104ID162_002327	PTTG_00347
GN104ID162_002329	PTTG_00349
GN104ID162_002343	PTTG_00352
GN104ID162_002351	PTTG_00357
GN104ID162_002355	PTTG_00360
GN104ID162_002356	PTTG_00361
GN104ID162_002358	PTTG_00362
GN104ID162_002359	PTTG_00363T1
GN104ID162_002361	PTTG_00364
GN104ID162_002363	PTTG_00365
GN104ID162_002366	PTTG_00366
GN104ID162_002382	PTTG_00372
GN104ID162_002394	PTTG_00378
GN104ID162_002396	PTTG_00379
GN104ID162_002397	PTTG_00380
GN104ID162_002399	PTTG_00381
GN104ID162_002401	PTTG_00382
GN104ID162_002404	PTTG_00383
GN104ID162_002408	PTTG_00386
GN104ID162_002409	PTTG_00387
GN104ID162_002412	PTTG_00388
GN104ID162_002414	PTTG_00389
GN104ID162_002419	PTTG_00391
GN104ID162_008577	PTTG_00392
GN104ID162_008576	PTTG_00393
GN104ID162_008574	PTTG_00395
GN104ID162_002429	PTTG_00396
GN104ID162_002431	PTTG_00397
GN104ID162_002433	PTTG_00398
GN104ID162_002434	PTTG_00399
GN104ID162_002438	PTTG_00400
GN104ID162_002442	PTTG_00402
GN104ID162_002444	PTTG_00403
GN104ID162_002451,GN104ID162_026465	PTTG_00410
GN104ID162_002452,GN104ID162_026466	PTTG_00411
GN104ID162_002453,GN104ID162_026467	PTTG_00412
GN104ID162_002456,GN104ID162_026470	PTTG_00414
GN104ID162_002458,GN104ID162_026472	PTTG_00415
GN104ID162_002460,GN104ID162_026474	PTTG_00416
GN104ID162_002467,GN104ID162_026481	PTTG_00418
GN104ID162_002469,GN104ID162_026497	PTTG_00419
GN104ID162_026506	PTTG_00422
GN104ID162_002486,GN104ID162_026517	PTTG_00425
GN104ID162_002487,GN104ID162_026518	PTTG_00426
GN104ID162_002491	PTTG_00428
GN104ID162_002495	PTTG_00430
GN104ID162_002498	PTTG_00432
GN104ID162_002501	PTTG_00434,PTTG_00434T1
GN104ID162_011721	PTTG_00435
GN104ID162_002520	PTTG_00437
GN104ID162_002521	PTTG_00438
GN104ID162_025855	PTTG_00442
GN104ID162_025860	PTTG_00443
GN104ID162_025862	PTTG_00444
GN104ID162_025863	PTTG_00445,PTTG_00445T2
GN104ID162_001111	PTTG_00447
GN104ID162_015216	PTTG_00457,PTTG_00457T1,PTTG_00457T2
GN104ID162_015214	PTTG_00458
GN104ID162_015212	PTTG_00459
GN104ID162_015207	PTTG_00460
GN104ID162_015206	PTTG_00461
GN104ID162_015204	PTTG_00462
GN104ID162_015202	PTTG_00464
GN104ID162_015195	PTTG_00467
GN104ID162_015193	PTTG_00468
GN104ID162_015192	PTTG_00469
GN104ID162_015189	PTTG_00470
GN104ID162_015173	PTTG_00473
GN104ID162_015126	PTTG_00492
GN104ID162_015122	PTTG_00495
GN104ID162_015120	PTTG_00497
GN104ID162_015110	PTTG_00499
GN104ID162_015107	PTTG_00500,PTTG_00500T1
GN104ID162_015100	PTTG_00501
GN104ID162_015096	PTTG_00503
GN104ID162_015092	PTTG_00504
GN104ID162_015085	PTTG_00510
GN104ID162_015083	PTTG_00511
GN104ID162_015082	PTTG_00512
GN104ID162_015078	PTTG_00514
GN104ID162_015046	PTTG_00531
GN104ID162_015032	PTTG_00538
GN104ID162_015031	PTTG_00540
GN104ID162_015028	PTTG_00541
GN104ID162_015015	PTTG_00544
GN104ID162_015006	PTTG_00546
GN104ID162_014994	PTTG_00548
GN104ID162_014986	PTTG_00551
GN104ID162_014979	PTTG_00553
GN104ID162_020632,GN104ID162_028096	PTTG_00555
GN104ID162_014974	PTTG_00557
GN104ID162_014966	PTTG_00560
GN104ID162_014964	PTTG_00561
GN104ID162_014947	PTTG_00567
GN104ID162_014945	PTTG_00568
GN104ID162_014943	PTTG_00569
GN104ID162_014941	PTTG_00570
GN104ID162_014892	PTTG_00585
GN104ID162_014891	PTTG_00586
GN104ID162_004402	PTTG_00589
GN104ID162_004403	PTTG_00590
GN104ID162_014879	PTTG_00591
GN104ID162_014877	PTTG_00592
GN104ID162_014857	PTTG_00598
GN104ID162_014856	PTTG_00599
GN104ID162_014854	PTTG_00601
GN104ID162_018762	PTTG_00602
GN104ID162_018765	PTTG_00603
GN104ID162_008468	PTTG_00606
GN104ID162_017826	PTTG_00653
GN104ID162_012311	PTTG_00654
GN104ID162_012314	PTTG_00655
GN104ID162_012316	PTTG_00656
GN104ID162_012317	PTTG_00658
GN104ID162_012318	PTTG_00659
GN104ID162_012319	PTTG_00660
GN104ID162_012322	PTTG_00661
GN104ID162_012324	PTTG_00662
GN104ID162_012328	PTTG_00664
GN104ID162_012331	PTTG_00665
GN104ID162_012332	PTTG_00666,PTTG_00666T1
GN104ID162_012335	PTTG_00668
GN104ID162_012338	PTTG_00670
GN104ID162_012339	PTTG_00671
GN104ID162_012340,GN104ID162_012344	PTTG_00672
GN104ID162_012349	PTTG_00674
GN104ID162_012351	PTTG_00675
GN104ID162_012354	PTTG_00677
GN104ID162_012363	PTTG_00680
GN104ID162_012369	PTTG_00682
GN104ID162_012370	PTTG_00683
GN104ID162_012373	PTTG_00684,PTTG_00684T1
GN104ID162_012379	PTTG_00685
GN104ID162_012382	PTTG_00686
GN104ID162_012383	PTTG_00687
GN104ID162_012385	PTTG_00688
GN104ID162_012388	PTTG_00689
GN104ID162_012389	PTTG_00690
GN104ID162_012405	PTTG_00693
GN104ID162_012406	PTTG_00694
GN104ID162_012407	PTTG_00695
GN104ID162_012409	PTTG_00696
GN104ID162_022536	PTTG_00705
GN104ID162_005282,GN104ID162_014847	PTTG_00712
GN104ID162_012466	PTTG_00719
GN104ID162_011791	PTTG_00722
GN104ID162_012476	PTTG_00727
GN104ID162_023130,GN104ID162_028491	PTTG_00728
GN104ID162_023134,GN104ID162_028488	PTTG_00732
GN104ID162_028475	PTTG_00736
GN104ID162_028474	PTTG_00737
GN104ID162_028472	PTTG_00738
GN104ID162_022518	PTTG_00740
GN104ID162_022517	PTTG_00741
GN104ID162_022516	PTTG_00742
GN104ID162_023167	PTTG_00746
GN104ID162_023168	PTTG_00747
GN104ID162_023169	PTTG_00748
GN104ID162_023170	PTTG_00749
GN104ID162_023174	PTTG_00750
GN104ID162_023177	PTTG_00751T1
GN104ID162_016738	PTTG_00753
GN104ID162_016740	PTTG_00754
GN104ID162_016744	PTTG_00755
GN104ID162_016751	PTTG_00757
GN104ID162_016755	PTTG_00758
GN104ID162_016771	PTTG_00762
GN104ID162_016776	PTTG_00764,PTTG_00764T1
GN104ID162_016783	PTTG_00765
GN104ID162_016785	PTTG_00766
GN104ID162_016803,GN104ID162_022334	PTTG_00770
GN104ID162_022335	PTTG_00771
GN104ID162_016805,GN104ID162_022336	PTTG_00772
GN104ID162_022337	PTTG_00774
GN104ID162_022346	PTTG_00775
GN104ID162_022349	PTTG_00776
GN104ID162_022350	PTTG_00778
GN104ID162_022371	PTTG_00779
GN104ID162_022387	PTTG_00783
GN104ID162_022388	PTTG_00784
GN104ID162_022396	PTTG_00786
GN104ID162_022400	PTTG_00787
GN104ID162_022406	PTTG_00789
GN104ID162_022414	PTTG_00791
GN104ID162_022418	PTTG_00792,PTTG_00792T1
GN104ID162_016130	PTTG_00793
GN104ID162_022427	PTTG_00796
GN104ID162_022429	PTTG_00798
GN104ID162_022433	PTTG_00801
GN104ID162_022455	PTTG_00805
GN104ID162_022457	PTTG_00806
GN104ID162_022461	PTTG_00807
GN104ID162_003670	PTTG_00810
GN104ID162_022467	PTTG_00812
GN104ID162_022468	PTTG_00813
GN104ID162_022471	PTTG_00816
GN104ID162_022473	PTTG_00817
GN104ID162_022474	PTTG_00818
GN104ID162_022475	PTTG_00819
GN104ID162_014807,GN104ID162_028773	PTTG_00820
GN104ID162_014812,GN104ID162_028777	PTTG_00822
GN104ID162_014816	PTTG_00823
GN104ID162_014821,GN104ID162_028783	PTTG_00824
GN104ID162_005201	PTTG_00827
GN104ID162_005199	PTTG_00828
GN104ID162_005197	PTTG_00829
GN104ID162_005187	PTTG_00834
GN104ID162_005186	PTTG_00835
GN104ID162_005180	PTTG_00836
GN104ID162_005179	PTTG_00837
GN104ID162_005177	PTTG_00838
GN104ID162_005176	PTTG_00839,PTTG_00839T1
GN104ID162_005098	PTTG_00874
GN104ID162_005096	PTTG_00875
GN104ID162_005094	PTTG_00876
GN104ID162_005092	PTTG_00877
GN104ID162_005091	PTTG_00878
GN104ID162_005088	PTTG_00879
GN104ID162_005087	PTTG_00880
GN104ID162_005083	PTTG_00881
GN104ID162_005082	PTTG_00882
GN104ID162_005081	PTTG_00883
GN104ID162_021458	PTTG_00885
GN104ID162_021455	PTTG_00886
GN104ID162_021442	PTTG_00889
GN104ID162_021441	PTTG_00890
GN104ID162_021440	PTTG_00891
GN104ID162_021439	PTTG_00892
GN104ID162_011343	PTTG_00894
GN104ID162_021436	PTTG_00895
GN104ID162_021434	PTTG_00896
GN104ID162_024762	PTTG_00899
GN104ID162_021425	PTTG_00903,PTTG_00903T1
GN104ID162_021424	PTTG_00904
GN104ID162_021420	PTTG_00907
GN104ID162_021410	PTTG_00910
GN104ID162_021409	PTTG_00911
GN104ID162_021408	PTTG_00912
GN104ID162_021405	PTTG_00913,PTTG_00913T1
GN104ID162_021402	PTTG_00914
GN104ID162_021401	PTTG_00915
GN104ID162_021400	PTTG_00916
GN104ID162_021397	PTTG_00917
GN104ID162_021393	PTTG_00918
GN104ID162_021391	PTTG_00919
GN104ID162_021383	PTTG_00922
GN104ID162_021380	PTTG_00924
GN104ID162_021378	PTTG_00925
GN104ID162_021375	PTTG_00926
GN104ID162_005000	PTTG_00928
GN104ID162_004989	PTTG_00930
GN104ID162_004986	PTTG_00933
GN104ID162_004985	PTTG_00934
GN104ID162_004984	PTTG_00935
GN104ID162_004977	PTTG_00937
GN104ID162_004976	PTTG_00938
GN104ID162_004975	PTTG_00939
GN104ID162_004972	PTTG_00943
GN104ID162_004969	PTTG_00944
GN104ID162_004968	PTTG_00945
GN104ID162_004966	PTTG_00946
GN104ID162_004965	PTTG_00947
GN104ID162_004964	PTTG_00948
GN104ID162_004963	PTTG_00949
GN104ID162_004958	PTTG_00950
GN104ID162_004955	PTTG_00951,PTTG_00951T1
GN104ID162_004953	PTTG_00952
GN104ID162_004951	PTTG_00953
GN104ID162_004944	PTTG_00956
GN104ID162_004937	PTTG_00958T1
GN104ID162_004933	PTTG_00960
GN104ID162_004932	PTTG_00961
GN104ID162_004924	PTTG_00963
GN104ID162_004919	PTTG_00965
GN104ID162_004902	PTTG_00970
GN104ID162_004887	PTTG_00973
GN104ID162_004885	PTTG_00974
GN104ID162_004884	PTTG_00975
GN104ID162_004882	PTTG_00976
GN104ID162_004880	PTTG_00977
GN104ID162_004875	PTTG_00979
GN104ID162_004874	PTTG_00980
GN104ID162_004870	PTTG_00981
GN104ID162_004861	PTTG_00984
GN104ID162_004850	PTTG_00987
GN104ID162_004844	PTTG_00990
GN104ID162_004843	PTTG_00991
GN104ID162_004839	PTTG_00992
GN104ID162_004835	PTTG_00994
GN104ID162_004834	PTTG_00995
GN104ID162_004831	PTTG_00996
GN104ID162_004828,GN104ID162_017854	PTTG_00997
GN104ID162_004827,GN104ID162_017855	PTTG_00998
GN104ID162_004825,GN104ID162_017857	PTTG_00999
GN104ID162_017858	PTTG_01001
GN104ID162_017869	PTTG_01002
GN104ID162_017879	PTTG_01005
GN104ID162_017888	PTTG_01009
GN104ID162_017890	PTTG_01010
GN104ID162_017891	PTTG_01011
GN104ID162_017895	PTTG_01013
GN104ID162_017905	PTTG_01019
GN104ID162_017907	PTTG_01020
GN104ID162_017908	PTTG_01021,PTTG_01021T1
GN104ID162_017909	PTTG_01022
GN104ID162_017910	PTTG_01023
GN104ID162_017913	PTTG_01024
GN104ID162_017914	PTTG_01025
GN104ID162_017921	PTTG_01027
GN104ID162_017924	PTTG_01029,PTTG_01029T1
GN104ID162_017925	PTTG_01030
GN104ID162_013690	PTTG_01032
GN104ID162_009790	PTTG_01035
GN104ID162_000186	PTTG_01041
GN104ID162_000187	PTTG_01042
GN104ID162_000188	PTTG_01043,PTTG_01043T1
GN104ID162_000191	PTTG_01044
GN104ID162_000192	PTTG_01045
GN104ID162_000194	PTTG_01046
GN104ID162_011864	PTTG_01047
GN104ID162_000199	PTTG_01048
GN104ID162_000207	PTTG_01049
GN104ID162_000208	PTTG_01050
GN104ID162_023754	PTTG_01053
GN104ID162_022119	PTTG_01056
GN104ID162_022116	PTTG_01057
GN104ID162_022102	PTTG_01062
GN104ID162_022101	PTTG_01063
GN104ID162_022096	PTTG_01065
GN104ID162_022082	PTTG_01069
GN104ID162_022079	PTTG_01071
GN104ID162_006540	PTTG_01073
GN104ID162_022075	PTTG_01074
GN104ID162_022072	PTTG_01075
GN104ID162_022071	PTTG_01076
GN104ID162_022066	PTTG_01077
GN104ID162_022061	PTTG_01080
GN104ID162_022051	PTTG_01086
GN104ID162_022050	PTTG_01087
GN104ID162_022049	PTTG_01088
GN104ID162_022030	PTTG_01094
GN104ID162_022028	PTTG_01095
GN104ID162_022027	PTTG_01096
GN104ID162_022026	PTTG_01097
GN104ID162_022024	PTTG_01098
GN104ID162_022022	PTTG_01099
GN104ID162_022018	PTTG_01100
GN104ID162_022011	PTTG_01101
GN104ID162_022008	PTTG_01102,PTTG_01102T1
GN104ID162_022004	PTTG_01103
GN104ID162_021989	PTTG_01106
GN104ID162_021984	PTTG_01107
GN104ID162_021983	PTTG_01108
GN104ID162_021979	PTTG_01109
GN104ID162_021978	PTTG_01110
GN104ID162_006795	PTTG_01111
GN104ID162_021975	PTTG_01112
GN104ID162_021972	PTTG_01113
GN104ID162_021966	PTTG_01115
GN104ID162_021965	PTTG_01116
GN104ID162_021963	PTTG_01117
GN104ID162_021957	PTTG_01118
GN104ID162_021955	PTTG_01119
GN104ID162_021953	PTTG_01120
GN104ID162_021952	PTTG_01121
GN104ID162_014250	PTTG_01123
GN104ID162_007606	PTTG_01125
GN104ID162_007610	PTTG_01126
GN104ID162_007611	PTTG_01127
GN104ID162_007615	PTTG_01128,PTTG_01128T1
GN104ID162_007620	PTTG_01129,PTTG_01129T1
GN104ID162_007625	PTTG_01130
GN104ID162_007626	PTTG_01131
GN104ID162_007628	PTTG_01132
GN104ID162_007633	PTTG_01133
GN104ID162_007637	PTTG_01134
GN104ID162_010825	PTTG_01137
GN104ID162_007670	PTTG_01138
GN104ID162_007673	PTTG_01139
GN104ID162_007676	PTTG_01140
GN104ID162_007679	PTTG_01141
GN104ID162_007681	PTTG_01143
GN104ID162_007690	PTTG_01145
GN104ID162_015886	PTTG_01150
GN104ID162_008015	PTTG_01152
GN104ID162_008013	PTTG_01153
GN104ID162_008009	PTTG_01154
GN104ID162_008001	PTTG_01155
GN104ID162_008000	PTTG_01156
GN104ID162_007995	PTTG_01157
GN104ID162_007994	PTTG_01158
GN104ID162_007985	PTTG_01160
GN104ID162_007983	PTTG_01161
GN104ID162_007976	PTTG_01162
GN104ID162_003990	PTTG_01163
GN104ID162_003991	PTTG_01164
GN104ID162_003992	PTTG_01166
GN104ID162_003993	PTTG_01168
GN104ID162_007972	PTTG_01169,PTTG_01169T1
GN104ID162_003994	PTTG_01170
GN104ID162_003996	PTTG_01172
GN104ID162_003997	PTTG_01173
GN104ID162_004000	PTTG_01174
GN104ID162_007952	PTTG_01179
GN104ID162_007945	PTTG_01182
GN104ID162_007944	PTTG_01183
GN104ID162_007941	PTTG_01186
GN104ID162_007939	PTTG_01187
GN104ID162_007937	PTTG_01188
GN104ID162_007936	PTTG_01189
GN104ID162_007935	PTTG_01190
GN104ID162_007926	PTTG_01191
GN104ID162_005519,GN104ID162_019005	PTTG_01194
GN104ID162_007905	PTTG_01196
GN104ID162_007903	PTTG_01198
GN104ID162_007901	PTTG_01199
GN104ID162_007898	PTTG_01200
GN104ID162_007897	PTTG_01201
GN104ID162_007896	PTTG_01202
GN104ID162_007895	PTTG_01203
GN104ID162_007893	PTTG_01204
GN104ID162_007892	PTTG_01205
GN104ID162_007888	PTTG_01206
GN104ID162_007886	PTTG_01207
GN104ID162_007881	PTTG_01208
GN104ID162_007867	PTTG_01211
GN104ID162_007861	PTTG_01218
GN104ID162_007860	PTTG_01219
GN104ID162_007858	PTTG_01220
GN104ID162_007854	PTTG_01222
GN104ID162_007852	PTTG_01223
GN104ID162_007851	PTTG_01224
GN104ID162_007840	PTTG_01227
GN104ID162_007838	PTTG_01228
GN104ID162_007836	PTTG_01229
GN104ID162_007832	PTTG_01231
GN104ID162_007821	PTTG_01233
GN104ID162_007813	PTTG_01234
GN104ID162_007807	PTTG_01237
GN104ID162_007803	PTTG_01239
GN104ID162_007790	PTTG_01242
GN104ID162_016535	PTTG_01252
GN104ID162_016534	PTTG_01253
GN104ID162_016522	PTTG_01256
GN104ID162_016514	PTTG_01258
GN104ID162_016487	PTTG_01266
GN104ID162_016485	PTTG_01267,PTTG_01267T1
GN104ID162_021106	PTTG_01276
GN104ID162_021109	PTTG_01277
GN104ID162_021119	PTTG_01279
GN104ID162_021126	PTTG_01281
GN104ID162_021134	PTTG_01283
GN104ID162_021135	PTTG_01284
GN104ID162_021144	PTTG_01286
GN104ID162_021145	PTTG_01287
GN104ID162_021156	PTTG_01292
GN104ID162_021160	PTTG_01293,PTTG_01293T1
GN104ID162_021162	PTTG_01294
GN104ID162_021166	PTTG_01296
GN104ID162_021185	PTTG_01301
GN104ID162_021190	PTTG_01303
GN104ID162_021196	PTTG_01308
GN104ID162_021199	PTTG_01309
GN104ID162_021200	PTTG_01310
GN104ID162_021202	PTTG_01311
GN104ID162_021205	PTTG_01313
GN104ID162_009701	PTTG_01321
GN104ID162_009704	PTTG_01322
GN104ID162_009720	PTTG_01325
GN104ID162_009722	PTTG_01327
GN104ID162_009726	PTTG_01328
GN104ID162_009727	PTTG_01329
GN104ID162_009729	PTTG_01331
GN104ID162_009731	PTTG_01332
GN104ID162_009733	PTTG_01333
GN104ID162_009735	PTTG_01334
GN104ID162_009737	PTTG_01335
GN104ID162_009740	PTTG_01336
GN104ID162_009742	PTTG_01337
GN104ID162_009744	PTTG_01338
GN104ID162_009751	PTTG_01339
GN104ID162_009752	PTTG_01340
GN104ID162_009753	PTTG_01341
GN104ID162_004394	PTTG_01342
GN104ID162_004391	PTTG_01343
GN104ID162_009757	PTTG_01346
GN104ID162_009761	PTTG_01350
GN104ID162_012546	PTTG_01357
GN104ID162_021874	PTTG_01359
GN104ID162_021855	PTTG_01361
GN104ID162_021850	PTTG_01363
GN104ID162_021848	PTTG_01364
GN104ID162_021846	PTTG_01365
GN104ID162_021844	PTTG_01366
GN104ID162_021840	PTTG_01367
GN104ID162_021832	PTTG_01369
GN104ID162_021830	PTTG_01370
GN104ID162_021828	PTTG_01371
GN104ID162_021810	PTTG_01377
GN104ID162_021809	PTTG_01378
GN104ID162_016072,GN104ID162_023561	PTTG_01380
GN104ID162_016063,GN104ID162_023560	PTTG_01381
GN104ID162_002924	PTTG_01386
GN104ID162_006853	PTTG_01394
GN104ID162_007448	PTTG_01400
GN104ID162_007449	PTTG_01401
GN104ID162_010928	PTTG_01402
GN104ID162_009382	PTTG_01403
GN104ID162_007462	PTTG_01408
GN104ID162_007463	PTTG_01409
GN104ID162_008289	PTTG_01410
GN104ID162_008290	PTTG_01411
GN104ID162_007464	PTTG_01414
GN104ID162_007465	PTTG_01415
GN104ID162_007473	PTTG_01420
GN104ID162_007475	PTTG_01421
GN104ID162_007489	PTTG_01422
GN104ID162_007490	PTTG_01423
GN104ID162_019800	PTTG_01424
GN104ID162_007501	PTTG_01426
GN104ID162_007508	PTTG_01427
GN104ID162_004312,GN104ID162_007509	PTTG_01428
GN104ID162_007520	PTTG_01429,PTTG_01429T1
GN104ID162_007522	PTTG_01430T2
GN104ID162_007523	PTTG_01431
GN104ID162_007532	PTTG_01433
GN104ID162_007534	PTTG_01435
GN104ID162_007536	PTTG_01436
GN104ID162_007538	PTTG_01437
GN104ID162_007545	PTTG_01438
GN104ID162_007547	PTTG_01439
GN104ID162_007551	PTTG_01440
GN104ID162_007553	PTTG_01441
GN104ID162_007554	PTTG_01442
GN104ID162_007561	PTTG_01444
GN104ID162_007563	PTTG_01445
GN104ID162_007567	PTTG_01446
GN104ID162_007571	PTTG_01447
GN104ID162_007572	PTTG_01448
GN104ID162_007573	PTTG_01449
GN104ID162_007576	PTTG_01450
GN104ID162_007577	PTTG_01451
GN104ID162_007585,GN104ID162_015651	PTTG_01453
GN104ID162_015642	PTTG_01454
GN104ID162_015630	PTTG_01455
GN104ID162_015629	PTTG_01456
GN104ID162_015628	PTTG_01457
GN104ID162_015624	PTTG_01458
GN104ID162_015612	PTTG_01461
GN104ID162_015592	PTTG_01468
GN104ID162_015591	PTTG_01469
GN104ID162_006545	PTTG_01471
GN104ID162_006543	PTTG_01473,PTTG_01473T1
GN104ID162_015582	PTTG_01474
GN104ID162_015571	PTTG_01477
GN104ID162_015564	PTTG_01479
GN104ID162_015559	PTTG_01480
GN104ID162_015556	PTTG_01482
GN104ID162_014780	PTTG_01483
GN104ID162_015550	PTTG_01484
GN104ID162_015548	PTTG_01487
GN104ID162_015546	PTTG_01489
GN104ID162_009997	PTTG_01501
GN104ID162_010003	PTTG_01504
GN104ID162_022122	PTTG_01505
GN104ID162_010008	PTTG_01506
GN104ID162_010009	PTTG_01507
GN104ID162_010012	PTTG_01508
GN104ID162_010017	PTTG_01509
GN104ID162_010026	PTTG_01510
GN104ID162_010027	PTTG_01511
GN104ID162_010029	PTTG_01512
GN104ID162_010031	PTTG_01513
GN104ID162_010033	PTTG_01514
GN104ID162_010034	PTTG_01515
GN104ID162_010035	PTTG_01516
GN104ID162_007158	PTTG_01518
GN104ID162_007151	PTTG_01521
GN104ID162_007147	PTTG_01522
GN104ID162_007144	PTTG_01523
GN104ID162_007142	PTTG_01525
GN104ID162_007140	PTTG_01526
GN104ID162_007137	PTTG_01527
GN104ID162_007135	PTTG_01528
GN104ID162_007125	PTTG_01530
GN104ID162_007118	PTTG_01531,PTTG_01531T1
GN104ID162_007107	PTTG_01535
GN104ID162_007100	PTTG_01536
GN104ID162_007090	PTTG_01539
GN104ID162_007089	PTTG_01540
GN104ID162_007088	PTTG_01541
GN104ID162_007077	PTTG_01547
GN104ID162_007075	PTTG_01548
GN104ID162_007074	PTTG_01550
GN104ID162_007067	PTTG_01551,PTTG_01551T1
GN104ID162_007065	PTTG_01554
GN104ID162_007064	PTTG_01555
GN104ID162_007061	PTTG_01557
GN104ID162_007060	PTTG_01558
GN104ID162_007057	PTTG_01559
GN104ID162_007055	PTTG_01560
GN104ID162_007053	PTTG_01561
GN104ID162_007052	PTTG_01562
GN104ID162_007051	PTTG_01563
GN104ID162_007043	PTTG_01565
GN104ID162_007041	PTTG_01566
GN104ID162_001177	PTTG_01574
GN104ID162_001182	PTTG_01575
GN104ID162_001189	PTTG_01578
GN104ID162_001193	PTTG_01579
GN104ID162_001194	PTTG_01580
GN104ID162_001206	PTTG_01584
GN104ID162_001212	PTTG_01585
GN104ID162_001213	PTTG_01586
GN104ID162_001217	PTTG_01587
GN104ID162_001221	PTTG_01588
GN104ID162_001225	PTTG_01589
GN104ID162_001226	PTTG_01590
GN104ID162_001227	PTTG_01591
GN104ID162_001240	PTTG_01596
GN104ID162_001244	PTTG_01597
GN104ID162_001247	PTTG_01598
GN104ID162_001250	PTTG_01600
GN104ID162_001251	PTTG_01601
GN104ID162_001254	PTTG_01603
GN104ID162_001255	PTTG_01604
GN104ID162_001256	PTTG_01605
GN104ID162_001257	PTTG_01606
GN104ID162_001259	PTTG_01607
GN104ID162_001262	PTTG_01608
GN104ID162_001263	PTTG_01609
GN104ID162_001264	PTTG_01610
GN104ID162_001265	PTTG_01611
GN104ID162_001275	PTTG_01615
GN104ID162_001276	PTTG_01616
GN104ID162_001278	PTTG_01617
GN104ID162_001279	PTTG_01618
GN104ID162_001282	PTTG_01619
GN104ID162_001288	PTTG_01620
GN104ID162_001296	PTTG_01623
GN104ID162_027160	PTTG_01629
GN104ID162_027161	PTTG_01630
GN104ID162_005627,GN104ID162_027163	PTTG_01633
GN104ID162_005628	PTTG_01634
GN104ID162_027208,GN104ID162_027513	PTTG_01636
GN104ID162_027209,GN104ID162_027515	PTTG_01637
GN104ID162_013101	PTTG_01638
GN104ID162_013090	PTTG_01641
GN104ID162_013088	PTTG_01642
GN104ID162_013084	PTTG_01644
GN104ID162_013080	PTTG_01645
GN104ID162_013079	PTTG_01646
GN104ID162_013077	PTTG_01647
GN104ID162_013074	PTTG_01648
GN104ID162_013073	PTTG_01649
GN104ID162_013072	PTTG_01650
GN104ID162_013069	PTTG_01651,PTTG_01651T1
GN104ID162_013065	PTTG_01652
GN104ID162_013059	PTTG_01653
GN104ID162_013057	PTTG_01654
GN104ID162_013045	PTTG_01655
GN104ID162_013031	PTTG_01658
GN104ID162_013030	PTTG_01659
GN104ID162_013027	PTTG_01660
GN104ID162_024432	PTTG_01661
GN104ID162_013020	PTTG_01664
GN104ID162_013017	PTTG_01665
GN104ID162_013012	PTTG_01669
GN104ID162_013011	PTTG_01670
GN104ID162_013010	PTTG_01672
GN104ID162_013333	PTTG_01673
GN104ID162_013314	PTTG_01677
GN104ID162_013309	PTTG_01679
GN104ID162_013308	PTTG_01680
GN104ID162_013304	PTTG_01682
GN104ID162_013299	PTTG_01684
GN104ID162_013298	PTTG_01685
GN104ID162_013296	PTTG_01686
GN104ID162_013289	PTTG_01687
GN104ID162_013281	PTTG_01690
GN104ID162_015755	PTTG_01692
GN104ID162_015753	PTTG_01693
GN104ID162_015751	PTTG_01695
GN104ID162_015745	PTTG_01696
GN104ID162_015734	PTTG_01697
GN104ID162_015724	PTTG_01699
GN104ID162_015723	PTTG_01700
GN104ID162_015710	PTTG_01703
GN104ID162_016993	PTTG_01705
GN104ID162_016984	PTTG_01707
GN104ID162_016981	PTTG_01708T1,PTTG_01708T2
GN104ID162_016976	PTTG_01709
GN104ID162_016962	PTTG_01711
GN104ID162_016960	PTTG_01712
GN104ID162_016957	PTTG_01713
GN104ID162_016955	PTTG_01714
GN104ID162_016953	PTTG_01715
GN104ID162_001832	PTTG_01719,PTTG_01719T1
GN104ID162_008042	PTTG_01721
GN104ID162_008045	PTTG_01722
GN104ID162_008047	PTTG_01723
GN104ID162_008052	PTTG_01724
GN104ID162_008057	PTTG_01726
GN104ID162_008063	PTTG_01728
GN104ID162_025711	PTTG_01734
GN104ID162_025714	PTTG_01735
GN104ID162_025715	PTTG_01736
GN104ID162_025717	PTTG_01738
GN104ID162_003926	PTTG_01739
GN104ID162_025726	PTTG_01744
GN104ID162_025727	PTTG_01745
GN104ID162_025733	PTTG_01746
GN104ID162_012229	PTTG_01751
GN104ID162_025745	PTTG_01756
GN104ID162_014081	PTTG_01758
GN104ID162_014078	PTTG_01759
GN104ID162_025768	PTTG_01761
GN104ID162_025772	PTTG_01762
GN104ID162_025773	PTTG_01763
GN104ID162_006240,GN104ID162_028031	PTTG_01767
GN104ID162_006244,GN104ID162_028025	PTTG_01768
GN104ID162_006252,GN104ID162_028015	PTTG_01771
GN104ID162_006253,GN104ID162_028013	PTTG_01772
GN104ID162_006256,GN104ID162_028011	PTTG_01773
GN104ID162_006259,GN104ID162_028009	PTTG_01775
GN104ID162_006262,GN104ID162_028004	PTTG_01778
GN104ID162_006267	PTTG_01780
GN104ID162_006270	PTTG_01781
GN104ID162_006222	PTTG_01782,PTTG_01782T1
GN104ID162_006204	PTTG_01788
GN104ID162_006202	PTTG_01789
GN104ID162_006201	PTTG_01790
GN104ID162_006200	PTTG_01791
GN104ID162_006196,GN104ID162_020257	PTTG_01792
GN104ID162_006194	PTTG_01796
GN104ID162_006192	PTTG_01797
GN104ID162_006189	PTTG_01798
GN104ID162_006186	PTTG_01799
GN104ID162_006185	PTTG_01800
GN104ID162_006182	PTTG_01803
GN104ID162_006176	PTTG_01805
GN104ID162_006170	PTTG_01808
GN104ID162_006163	PTTG_01811T1,PTTG_01811T2
GN104ID162_006162	PTTG_01812
GN104ID162_006160	PTTG_01813
GN104ID162_006157	PTTG_01815
GN104ID162_006152	PTTG_01817
GN104ID162_006150	PTTG_01818
GN104ID162_006148	PTTG_01820
GN104ID162_006141	PTTG_01821
GN104ID162_006139	PTTG_01822
GN104ID162_006134	PTTG_01825
GN104ID162_006128	PTTG_01826
GN104ID162_006125	PTTG_01827
GN104ID162_006107	PTTG_01831
GN104ID162_006105	PTTG_01832
GN104ID162_006103	PTTG_01833
GN104ID162_006102	PTTG_01834
GN104ID162_006099,GN104ID162_024203	PTTG_01835
GN104ID162_006093	PTTG_01836,PTTG_01836T1
GN104ID162_006084	PTTG_01840
GN104ID162_006082	PTTG_01841
GN104ID162_006080	PTTG_01844
GN104ID162_006078	PTTG_01845
GN104ID162_006076	PTTG_01846
GN104ID162_006074	PTTG_01847
GN104ID162_006064	PTTG_01849
GN104ID162_006057	PTTG_01854
GN104ID162_006054	PTTG_01857
GN104ID162_006053	PTTG_01858
GN104ID162_006046	PTTG_01861
GN104ID162_006031	PTTG_01863
GN104ID162_006027	PTTG_01866
GN104ID162_006026	PTTG_01867
GN104ID162_006022	PTTG_01869
GN104ID162_016504	PTTG_01874
GN104ID162_016499	PTTG_01876
GN104ID162_003777	PTTG_01881
GN104ID162_003804	PTTG_01891
GN104ID162_003805	PTTG_01892T1
GN104ID162_003807	PTTG_01893
GN104ID162_003809	PTTG_01894
GN104ID162_003810	PTTG_01895
GN104ID162_003817	PTTG_01898
GN104ID162_003841	PTTG_01902
GN104ID162_003843	PTTG_01903
GN104ID162_003846	PTTG_01904
GN104ID162_003848	PTTG_01905
GN104ID162_003850	PTTG_01906
GN104ID162_003852	PTTG_01907
GN104ID162_003856	PTTG_01908
GN104ID162_003860	PTTG_01909
GN104ID162_003861	PTTG_01910T1
GN104ID162_003864	PTTG_01911
GN104ID162_003868	PTTG_01913
GN104ID162_003869	PTTG_01914
GN104ID162_003886	PTTG_01921
GN104ID162_013893	PTTG_01923
GN104ID162_003887	PTTG_01925
GN104ID162_003888	PTTG_01926
GN104ID162_003896	PTTG_01928
GN104ID162_020733	PTTG_01930
GN104ID162_000310	PTTG_01932
GN104ID162_000313	PTTG_01934
GN104ID162_020222,GN104ID162_024098	PTTG_01935
GN104ID162_000314	PTTG_01936
GN104ID162_000317	PTTG_01938
GN104ID162_000318	PTTG_01939
GN104ID162_000320	PTTG_01940
GN104ID162_000328	PTTG_01942
GN104ID162_000329	PTTG_01943
GN104ID162_000330	PTTG_01944
GN104ID162_000333	PTTG_01945
GN104ID162_000349	PTTG_01948
GN104ID162_021871	PTTG_11824
GN104ID162_000351	PTTG_01949
GN104ID162_000359	PTTG_01953T1
GN104ID162_000360	PTTG_01954
GN104ID162_000372	PTTG_01959
GN104ID162_000391	PTTG_01967
GN104ID162_000401	PTTG_01970
GN104ID162_000426	PTTG_01975
GN104ID162_000427	PTTG_01976
GN104ID162_000430	PTTG_01977T1
GN104ID162_022147	PTTG_01978
GN104ID162_022145	PTTG_01979
GN104ID162_022141	PTTG_01980
GN104ID162_022139	PTTG_01981
GN104ID162_017286	PTTG_01983
GN104ID162_022135	PTTG_01985
GN104ID162_027128	PTTG_01989
GN104ID162_027130	PTTG_01990
GN104ID162_027897	PTTG_01991
GN104ID162_027135	PTTG_01992
GN104ID162_027894	PTTG_01993
GN104ID162_026813,GN104ID162_027891	PTTG_01995
GN104ID162_027890	PTTG_01996
GN104ID162_027889	PTTG_01997
GN104ID162_026818,GN104ID162_027888	PTTG_01998
GN104ID162_027885	PTTG_01999
GN104ID162_027883	PTTG_02000
GN104ID162_027882	PTTG_02001
GN104ID162_026832,GN104ID162_027875	PTTG_02002
GN104ID162_026834,GN104ID162_027873	PTTG_02003
GN104ID162_012032,GN104ID162_012955	PTTG_02006
GN104ID162_012034,GN104ID162_012953	PTTG_02007
GN104ID162_012951	PTTG_02008
GN104ID162_012949	PTTG_02010
GN104ID162_012947	PTTG_02011
GN104ID162_012946	PTTG_02012
GN104ID162_012943	PTTG_02013
GN104ID162_012937	PTTG_02014
GN104ID162_012918	PTTG_02022
GN104ID162_012916	PTTG_02023
GN104ID162_012915	PTTG_02024
GN104ID162_012894	PTTG_02028
GN104ID162_012880	PTTG_02031
GN104ID162_020719	PTTG_02032
GN104ID162_020718	PTTG_02033
GN104ID162_020716	PTTG_02034
GN104ID162_020715	PTTG_02035
GN104ID162_012863	PTTG_02040
GN104ID162_020085,GN104ID162_024598	PTTG_02043
GN104ID162_012855	PTTG_02044
GN104ID162_012852	PTTG_02045
GN104ID162_012851	PTTG_02046
GN104ID162_012846	PTTG_02048
GN104ID162_012843	PTTG_02051
GN104ID162_012838	PTTG_02052
GN104ID162_012837	PTTG_02053,PTTG_02053T1
GN104ID162_013425	PTTG_02054
GN104ID162_012829	PTTG_02059,PTTG_02059T1
GN104ID162_012828	PTTG_02060
GN104ID162_012827	PTTG_02061
GN104ID162_012821	PTTG_02063
GN104ID162_012819	PTTG_02064
GN104ID162_012808	PTTG_02067
GN104ID162_012806	PTTG_02068
GN104ID162_012796	PTTG_02070
GN104ID162_012788	PTTG_02073
GN104ID162_012785	PTTG_02074
GN104ID162_012784	PTTG_02075
GN104ID162_012783	PTTG_02076
GN104ID162_012781	PTTG_02078
GN104ID162_012777	PTTG_02079
GN104ID162_014576	PTTG_02087
GN104ID162_014570	PTTG_02091
GN104ID162_005897	PTTG_02093
GN104ID162_019548	PTTG_02094
GN104ID162_014561	PTTG_02095
GN104ID162_014559	PTTG_02096
GN104ID162_019554	PTTG_02098
GN104ID162_019556	PTTG_02100
GN104ID162_019558	PTTG_02101
GN104ID162_019562	PTTG_02102
GN104ID162_019564	PTTG_02103
GN104ID162_019567	PTTG_02104
GN104ID162_019572	PTTG_02106
GN104ID162_019576	PTTG_02108
GN104ID162_019582	PTTG_02109,PTTG_02109T1
GN104ID162_000955	PTTG_02111
GN104ID162_009593	PTTG_02112
GN104ID162_019590	PTTG_02114
GN104ID162_019594	PTTG_02115
GN104ID162_019595	PTTG_02116
GN104ID162_019597	PTTG_02117
GN104ID162_019614	PTTG_02119
GN104ID162_019615	PTTG_02120
GN104ID162_019616	PTTG_02121
GN104ID162_019624	PTTG_02125
GN104ID162_019627	PTTG_02126
GN104ID162_019628	PTTG_02127
GN104ID162_019629	PTTG_02128
GN104ID162_019632	PTTG_02129
GN104ID162_019634	PTTG_02130
GN104ID162_019635	PTTG_02131
GN104ID162_019637	PTTG_02132
GN104ID162_019638	PTTG_02133
GN104ID162_019643	PTTG_02135
GN104ID162_019645	PTTG_02136
GN104ID162_019646	PTTG_02137
GN104ID162_019647	PTTG_02138
GN104ID162_019649	PTTG_02139
GN104ID162_019654	PTTG_02140
GN104ID162_019655	PTTG_02141
GN104ID162_019657	PTTG_02142
GN104ID162_019660	PTTG_02143
GN104ID162_019668	PTTG_02144
GN104ID162_019672	PTTG_02146
GN104ID162_019674	PTTG_02147
GN104ID162_019676	PTTG_02148
GN104ID162_019679	PTTG_02150
GN104ID162_019694	PTTG_02153
GN104ID162_019697	PTTG_02154
GN104ID162_019702	PTTG_02155
GN104ID162_019703	PTTG_02156
GN104ID162_019713	PTTG_02157
GN104ID162_019715	PTTG_02158
GN104ID162_019717	PTTG_02159
GN104ID162_019720	PTTG_02160
GN104ID162_019721	PTTG_02161
GN104ID162_015935	PTTG_02167
GN104ID162_015937	PTTG_02168
GN104ID162_015939	PTTG_02169
GN104ID162_015941	PTTG_02170
GN104ID162_015945	PTTG_02171
GN104ID162_015946	PTTG_02172
GN104ID162_015947	PTTG_02173
GN104ID162_015948	PTTG_02174
GN104ID162_015952	PTTG_02176
GN104ID162_015953	PTTG_02177
GN104ID162_015955	PTTG_02178
GN104ID162_015956	PTTG_02179
GN104ID162_015957	PTTG_02180
GN104ID162_015958	PTTG_02181
GN104ID162_015967	PTTG_02183
GN104ID162_015905	PTTG_02185
GN104ID162_015969	PTTG_02186
GN104ID162_015975	PTTG_02187
GN104ID162_015988	PTTG_02189
GN104ID162_015989	PTTG_02190
GN104ID162_015993	PTTG_02191
GN104ID162_015999	PTTG_02193
GN104ID162_016001	PTTG_02194
GN104ID162_016003	PTTG_02195
GN104ID162_016004	PTTG_02196
GN104ID162_016005	PTTG_02197
GN104ID162_016007	PTTG_02198
GN104ID162_016010	PTTG_02199
GN104ID162_016021	PTTG_02207
GN104ID162_016026	PTTG_02208
GN104ID162_016028	PTTG_02209
GN104ID162_014786	PTTG_02213
GN104ID162_014782	PTTG_02215
GN104ID162_023708	PTTG_02219
GN104ID162_023710	PTTG_02220
GN104ID162_023714	PTTG_02221
GN104ID162_023715	PTTG_02222
GN104ID162_023716	PTTG_02223
GN104ID162_023717	PTTG_02224
GN104ID162_023719	PTTG_02225
GN104ID162_023720	PTTG_02226
GN104ID162_023723	PTTG_02227
GN104ID162_023726	PTTG_02230
GN104ID162_023728	PTTG_02231
GN104ID162_023729	PTTG_02232
GN104ID162_023730	PTTG_02233
GN104ID162_023732	PTTG_02234
GN104ID162_023734	PTTG_02235
GN104ID162_001992	PTTG_02240
GN104ID162_023765	PTTG_02243
GN104ID162_023766	PTTG_02244,PTTG_02244T2
GN104ID162_023770	PTTG_02245
GN104ID162_023772	PTTG_02246
GN104ID162_023777	PTTG_02247
GN104ID162_023778	PTTG_02248
GN104ID162_023780	PTTG_02249
GN104ID162_023782	PTTG_02250
GN104ID162_023797	PTTG_02256
GN104ID162_023808	PTTG_02260
GN104ID162_023810	PTTG_02261
GN104ID162_023817	PTTG_02262
GN104ID162_023818	PTTG_02264
GN104ID162_023831	PTTG_02266
GN104ID162_023832	PTTG_02267
GN104ID162_014603	PTTG_02275
GN104ID162_014604	PTTG_02276
GN104ID162_014609	PTTG_02277
GN104ID162_014617	PTTG_02280
GN104ID162_014626	PTTG_02285
GN104ID162_014628,GN104ID162_023594	PTTG_02286
GN104ID162_014631	PTTG_02287
GN104ID162_014633	PTTG_02288
GN104ID162_014634	PTTG_02289
GN104ID162_014635	PTTG_02290
GN104ID162_014637	PTTG_02291
GN104ID162_014639	PTTG_02292
GN104ID162_014640	PTTG_02293
GN104ID162_014642	PTTG_02294,PTTG_02294T1
GN104ID162_014643	PTTG_02295
GN104ID162_014646	PTTG_02296
GN104ID162_014648	PTTG_02297
GN104ID162_014650	PTTG_02298
GN104ID162_010282,GN104ID162_027415	PTTG_02299
GN104ID162_014655	PTTG_02302
GN104ID162_014656	PTTG_02303
GN104ID162_014658	PTTG_02305
GN104ID162_014661	PTTG_02306
GN104ID162_014665	PTTG_02307
GN104ID162_014666	PTTG_02308
GN104ID162_014667	PTTG_02309
GN104ID162_014669	PTTG_02310
GN104ID162_014672	PTTG_02312
GN104ID162_014673	PTTG_02313
GN104ID162_014677	PTTG_02316
GN104ID162_014678	PTTG_02317
GN104ID162_014682	PTTG_02318
GN104ID162_014683	PTTG_02319
GN104ID162_014684	PTTG_02320
GN104ID162_014717	PTTG_02330
GN104ID162_014723	PTTG_02332T1
GN104ID162_014725	PTTG_02333
GN104ID162_014726	PTTG_02334
GN104ID162_014728	PTTG_02335
GN104ID162_016427,GN104ID162_017140	PTTG_02338
GN104ID162_016420,GN104ID162_017133	PTTG_02341
GN104ID162_016410	PTTG_02345
GN104ID162_016409	PTTG_02346
GN104ID162_016408	PTTG_02347
GN104ID162_016405	PTTG_02348
GN104ID162_016403	PTTG_02349
GN104ID162_016402	PTTG_02350
GN104ID162_016400	PTTG_02352
GN104ID162_016399	PTTG_02353
GN104ID162_016397	PTTG_02354
GN104ID162_016395	PTTG_02355
GN104ID162_016394	PTTG_02356
GN104ID162_016393	PTTG_02357
GN104ID162_016392	PTTG_02358,PTTG_02358T1
GN104ID162_016389	PTTG_02360
GN104ID162_022540	PTTG_02365
GN104ID162_014030	PTTG_02368
GN104ID162_016377	PTTG_02369
GN104ID162_016376	PTTG_02370
GN104ID162_016375	PTTG_02371
GN104ID162_016373	PTTG_02372
GN104ID162_016369	PTTG_02374
GN104ID162_016368	PTTG_02375
GN104ID162_016358	PTTG_02380
GN104ID162_016355	PTTG_02381,PTTG_02381T1
GN104ID162_016354	PTTG_02382
GN104ID162_016353	PTTG_02383
GN104ID162_016352	PTTG_02384
GN104ID162_016351	PTTG_02385
GN104ID162_016339	PTTG_02390
GN104ID162_016327	PTTG_02394
GN104ID162_016325	PTTG_02395
GN104ID162_016318	PTTG_02398
GN104ID162_016316	PTTG_02399,PTTG_02399T1
GN104ID162_016315	PTTG_02400
GN104ID162_016313	PTTG_02401
GN104ID162_016307	PTTG_02404
GN104ID162_016306	PTTG_02405
GN104ID162_016305	PTTG_02406
GN104ID162_016303	PTTG_02407
GN104ID162_016301	PTTG_02408
GN104ID162_016300	PTTG_02409
GN104ID162_016299	PTTG_02411
GN104ID162_016296	PTTG_02413
GN104ID162_016293	PTTG_02415
GN104ID162_016290	PTTG_02416
GN104ID162_016288	PTTG_02417
GN104ID162_016282	PTTG_02421
GN104ID162_016280	PTTG_02423
GN104ID162_016277	PTTG_02424
GN104ID162_016274	PTTG_02427
GN104ID162_016273	PTTG_02428
GN104ID162_016266	PTTG_02429
GN104ID162_016260	PTTG_02431
GN104ID162_016254	PTTG_02432
GN104ID162_016253	PTTG_02433
GN104ID162_016251	PTTG_02434
GN104ID162_016249	PTTG_02436
GN104ID162_016248	PTTG_02437
GN104ID162_016245	PTTG_02438
GN104ID162_016243	PTTG_02439
GN104ID162_016242	PTTG_02440
GN104ID162_016239	PTTG_02441
GN104ID162_016233	PTTG_02443
GN104ID162_016232	PTTG_02444
GN104ID162_016231	PTTG_02445
GN104ID162_016225	PTTG_02448
GN104ID162_016221	PTTG_02450
GN104ID162_016219	PTTG_02451
GN104ID162_016211	PTTG_02452,PTTG_02452T1
GN104ID162_016209	PTTG_02453
GN104ID162_016208	PTTG_02454
GN104ID162_016205	PTTG_02455
GN104ID162_016203	PTTG_02456
GN104ID162_016196	PTTG_02457
GN104ID162_016183	PTTG_02461
GN104ID162_016181	PTTG_02462,PTTG_02462T1
GN104ID162_016177	PTTG_02464
GN104ID162_016176	PTTG_02465
GN104ID162_016175	PTTG_02466
GN104ID162_016174	PTTG_02467
GN104ID162_016173	PTTG_02468
GN104ID162_016171	PTTG_02469
GN104ID162_016170	PTTG_02470
GN104ID162_016169	PTTG_02471,PTTG_02471T2
GN104ID162_016164	PTTG_02472
GN104ID162_016161	PTTG_02473
GN104ID162_016160	PTTG_02474
GN104ID162_016158	PTTG_02475
GN104ID162_016153	PTTG_02476
GN104ID162_016152	PTTG_02477
GN104ID162_016151	PTTG_02478T1
GN104ID162_016149	PTTG_02479
GN104ID162_020864	PTTG_02500
GN104ID162_020866	PTTG_02501
GN104ID162_020868	PTTG_02503
GN104ID162_020870	PTTG_02504
GN104ID162_020875	PTTG_02505
GN104ID162_020894	PTTG_02509
GN104ID162_020907	PTTG_02511
GN104ID162_020908	PTTG_02512
GN104ID162_020912	PTTG_02514
GN104ID162_020916	PTTG_02515
GN104ID162_020920	PTTG_02516
GN104ID162_020921	PTTG_02517
GN104ID162_020924	PTTG_02519
GN104ID162_020925	PTTG_02520
GN104ID162_020927	PTTG_02521
GN104ID162_020928	PTTG_02522
GN104ID162_020929	PTTG_02523T1
GN104ID162_020932	PTTG_02525
GN104ID162_020933	PTTG_02526
GN104ID162_020937	PTTG_02527
GN104ID162_020951	PTTG_02534
GN104ID162_020960	PTTG_02535
GN104ID162_020961	PTTG_02536
GN104ID162_020968	PTTG_02538
GN104ID162_020972	PTTG_02539
GN104ID162_020983	PTTG_02540
GN104ID162_021290	PTTG_02541,PTTG_02541T1
GN104ID162_021289	PTTG_02542
GN104ID162_021001	PTTG_02548
GN104ID162_021002	PTTG_02549
GN104ID162_021006	PTTG_02553
GN104ID162_003553	PTTG_02564
GN104ID162_003568	PTTG_02566,PTTG_02566T1
GN104ID162_003576	PTTG_02571
GN104ID162_003582	PTTG_02572
GN104ID162_003583	PTTG_02573
GN104ID162_003596	PTTG_02578
GN104ID162_003597	PTTG_02579T1
GN104ID162_009098	PTTG_02581
GN104ID162_009097	PTTG_02582
GN104ID162_009076	PTTG_02586
GN104ID162_009075	PTTG_02587
GN104ID162_009072	PTTG_02589
GN104ID162_009066	PTTG_02590
GN104ID162_009064	PTTG_02592
GN104ID162_009063	PTTG_02593
GN104ID162_009060	PTTG_02594
GN104ID162_009059	PTTG_02595
GN104ID162_009055	PTTG_02596
GN104ID162_009050	PTTG_02597
GN104ID162_009049	PTTG_02598
GN104ID162_009048	PTTG_02599
GN104ID162_009043	PTTG_02601
GN104ID162_009041	PTTG_02602
GN104ID162_009029	PTTG_02605
GN104ID162_009027	PTTG_02606
GN104ID162_009026	PTTG_02607,PTTG_02607T1
GN104ID162_009019	PTTG_02608
GN104ID162_009016	PTTG_02611
GN104ID162_009013	PTTG_02612
GN104ID162_009005	PTTG_02613
GN104ID162_008996	PTTG_02614
GN104ID162_008993	PTTG_02615
GN104ID162_008985	PTTG_02616
GN104ID162_008980	PTTG_02617
GN104ID162_008979	PTTG_02618
GN104ID162_008975	PTTG_02619
GN104ID162_008974	PTTG_02620
GN104ID162_008973	PTTG_02621
GN104ID162_008972	PTTG_02622
GN104ID162_008970	PTTG_02623
GN104ID162_008969	PTTG_02624
GN104ID162_008966	PTTG_02625
GN104ID162_008964	PTTG_02626
GN104ID162_007414,GN104ID162_018565	PTTG_02628
GN104ID162_008949	PTTG_02632
GN104ID162_008948	PTTG_02633
GN104ID162_008947	PTTG_02634
GN104ID162_008941	PTTG_02637
GN104ID162_008939	PTTG_02638
GN104ID162_020464	PTTG_02640
GN104ID162_008927	PTTG_02643
GN104ID162_008923	PTTG_02644
GN104ID162_008918	PTTG_02646
GN104ID162_008916	PTTG_02647
GN104ID162_008905	PTTG_02650
GN104ID162_008900	PTTG_02651
GN104ID162_008891	PTTG_02652
GN104ID162_008890	PTTG_02653
GN104ID162_008881	PTTG_02657
GN104ID162_008880	PTTG_02658
GN104ID162_008876	PTTG_02659
GN104ID162_008873	PTTG_02661
GN104ID162_008866	PTTG_02663T1
GN104ID162_008864	PTTG_02664
GN104ID162_008863	PTTG_02665
GN104ID162_008861	PTTG_02666
GN104ID162_008860	PTTG_02667
GN104ID162_008856	PTTG_02669
GN104ID162_008853	PTTG_02671
GN104ID162_008852,GN104ID162_011086	PTTG_02672
GN104ID162_003135	PTTG_02680
GN104ID162_011042	PTTG_02683
GN104ID162_008329,GN104ID162_028187	PTTG_02690
GN104ID162_022524	PTTG_02702T1
GN104ID162_008388	PTTG_02711
GN104ID162_008389	PTTG_02712
GN104ID162_008413	PTTG_02717
GN104ID162_008414	PTTG_02718
GN104ID162_008415	PTTG_02719
GN104ID162_008417	PTTG_02720
GN104ID162_008418	PTTG_02721
GN104ID162_012486,GN104ID162_028926	PTTG_02723
GN104ID162_008424	PTTG_02725
GN104ID162_008426	PTTG_02726
GN104ID162_008427	PTTG_02727
GN104ID162_008428	PTTG_02728
GN104ID162_008434	PTTG_02730
GN104ID162_008435	PTTG_02731
GN104ID162_008437	PTTG_02732
GN104ID162_008439	PTTG_02733
GN104ID162_008443	PTTG_02735
GN104ID162_008446	PTTG_02736
GN104ID162_008448	PTTG_02737
GN104ID162_008462	PTTG_02739T1
GN104ID162_008473	PTTG_02741
GN104ID162_008474	PTTG_02742
GN104ID162_008476	PTTG_02743
GN104ID162_008477	PTTG_02744
GN104ID162_008479	PTTG_02745
GN104ID162_008482	PTTG_02746
GN104ID162_008483	PTTG_02747
GN104ID162_008486	PTTG_02749
GN104ID162_008488	PTTG_02750
GN104ID162_008495	PTTG_02754
GN104ID162_008498	PTTG_02755
GN104ID162_008502	PTTG_02758
GN104ID162_008503	PTTG_02759
GN104ID162_008505	PTTG_02760
GN104ID162_008508	PTTG_02762
GN104ID162_008510	PTTG_02763
GN104ID162_008518	PTTG_02768
GN104ID162_003442	PTTG_02774
GN104ID162_003440	PTTG_02775
GN104ID162_003435	PTTG_02777
GN104ID162_003433	PTTG_02778
GN104ID162_003432	PTTG_02779
GN104ID162_003431	PTTG_02780,PTTG_02780T1
GN104ID162_003417	PTTG_02788
GN104ID162_003405	PTTG_02794,PTTG_02794T1
GN104ID162_003404	PTTG_02795
GN104ID162_003403	PTTG_02796,PTTG_02796T1
GN104ID162_003402	PTTG_02797
GN104ID162_003400	PTTG_02798
GN104ID162_003393	PTTG_02799
GN104ID162_003392	PTTG_02800
GN104ID162_003377	PTTG_02801
GN104ID162_003351	PTTG_02810
GN104ID162_003349	PTTG_02811,PTTG_02811T1
GN104ID162_003345	PTTG_02812
GN104ID162_003334	PTTG_02818
GN104ID162_003332	PTTG_02819
GN104ID162_003330	PTTG_02820
GN104ID162_003327	PTTG_02821
GN104ID162_003326	PTTG_02822
GN104ID162_003322	PTTG_02823
GN104ID162_003318	PTTG_02824
GN104ID162_003311	PTTG_02825
GN104ID162_003309	PTTG_02827
GN104ID162_003305	PTTG_02828
GN104ID162_003302	PTTG_02829,PTTG_02829T1
GN104ID162_003285	PTTG_02837
GN104ID162_003284	PTTG_02838
GN104ID162_003280	PTTG_02840,PTTG_02840T1
GN104ID162_003271	PTTG_02844
GN104ID162_003262	PTTG_02846
GN104ID162_003259	PTTG_02847
GN104ID162_003258	PTTG_02848
GN104ID162_003233	PTTG_02854
GN104ID162_003223	PTTG_02857
GN104ID162_003216	PTTG_02862
GN104ID162_003215	PTTG_02863
GN104ID162_003213	PTTG_02864
GN104ID162_003209	PTTG_02865
GN104ID162_003205	PTTG_02867
GN104ID162_003201	PTTG_02868T1
GN104ID162_003196	PTTG_02870
GN104ID162_003192	PTTG_02873
GN104ID162_003191	PTTG_02874
GN104ID162_017200	PTTG_02876
GN104ID162_017197	PTTG_02877
GN104ID162_016481,GN104ID162_017194	PTTG_02878
GN104ID162_003181	PTTG_02881
GN104ID162_003180	PTTG_02882
GN104ID162_003179	PTTG_02883
GN104ID162_003178	PTTG_02884
GN104ID162_017186	PTTG_02887
GN104ID162_017185	PTTG_02888
GN104ID162_017182	PTTG_02889
GN104ID162_017181	PTTG_02890
GN104ID162_017179	PTTG_02891
GN104ID162_016466,GN104ID162_017177	PTTG_02892
GN104ID162_016460,GN104ID162_017173	PTTG_02894
GN104ID162_003158	PTTG_02897
GN104ID162_003152	PTTG_02898
GN104ID162_003151	PTTG_02899
GN104ID162_003149	PTTG_02900
GN104ID162_003147	PTTG_02901
GN104ID162_003146	PTTG_02902,PTTG_02902T1
GN104ID162_013662	PTTG_02907
GN104ID162_013656	PTTG_02911
GN104ID162_013654	PTTG_02912
GN104ID162_013652	PTTG_02913
GN104ID162_013646	PTTG_02915
GN104ID162_003437	PTTG_02917
GN104ID162_021051	PTTG_02919
GN104ID162_013615	PTTG_02927
GN104ID162_023502	PTTG_02929
GN104ID162_023496	PTTG_02930
GN104ID162_023494	PTTG_02931
GN104ID162_023483	PTTG_02934
GN104ID162_013575	PTTG_02947T1
GN104ID162_013569	PTTG_02948
GN104ID162_013568	PTTG_02949
GN104ID162_013567	PTTG_02950
GN104ID162_013561	PTTG_02952
GN104ID162_013556	PTTG_02953
GN104ID162_013554	PTTG_02954
GN104ID162_013550	PTTG_02957,PTTG_02957T1
GN104ID162_013549	PTTG_02958
GN104ID162_013548	PTTG_02959
GN104ID162_013525	PTTG_02966
GN104ID162_013501	PTTG_02977
GN104ID162_013498	PTTG_02978,PTTG_02978T1
GN104ID162_013478	PTTG_02981
GN104ID162_013476	PTTG_02982
GN104ID162_013470	PTTG_02983,PTTG_02983T1
GN104ID162_013468	PTTG_02984
GN104ID162_013466	PTTG_02985,PTTG_02985T1
GN104ID162_013460	PTTG_02987
GN104ID162_013458	PTTG_02988
GN104ID162_013454	PTTG_02989
GN104ID162_013451	PTTG_02990
GN104ID162_013450	PTTG_02991
GN104ID162_013449	PTTG_02992
GN104ID162_013444	PTTG_02995,PTTG_02995T1
GN104ID162_005970	PTTG_02997
GN104ID162_005969	PTTG_02998
GN104ID162_005968	PTTG_02999
GN104ID162_005966	PTTG_03000
GN104ID162_005961	PTTG_03003
GN104ID162_005958	PTTG_03004,PTTG_03004T1
GN104ID162_005954	PTTG_03005
GN104ID162_005951	PTTG_03007
GN104ID162_005950	PTTG_03008
GN104ID162_022653	PTTG_03010
GN104ID162_013705	PTTG_03013
GN104ID162_013706	PTTG_03014
GN104ID162_013708	PTTG_03015
GN104ID162_013711	PTTG_03017
GN104ID162_013713	PTTG_03018
GN104ID162_013714	PTTG_03019
GN104ID162_013718	PTTG_03022
GN104ID162_013719	PTTG_03023,PTTG_03023T1
GN104ID162_013722	PTTG_03024
GN104ID162_013730	PTTG_03025
GN104ID162_013733	PTTG_03027
GN104ID162_013737	PTTG_03028
GN104ID162_013738	PTTG_03029
GN104ID162_013748	PTTG_03033
GN104ID162_013749	PTTG_03034
GN104ID162_013750	PTTG_03035
GN104ID162_013751	PTTG_03036
GN104ID162_013753	PTTG_03037
GN104ID162_013754	PTTG_03038
GN104ID162_013755	PTTG_03039
GN104ID162_013756	PTTG_03040
GN104ID162_013758	PTTG_03041
GN104ID162_017565	PTTG_03042
GN104ID162_017567	PTTG_03043
GN104ID162_013766	PTTG_03045
GN104ID162_013768	PTTG_03046
GN104ID162_013770	PTTG_03047
GN104ID162_013775	PTTG_03049
GN104ID162_013776	PTTG_03050
GN104ID162_013782	PTTG_03051
GN104ID162_013786,GN104ID162_027719	PTTG_03052
GN104ID162_013787	PTTG_03053
GN104ID162_013794,GN104ID162_027709	PTTG_03055
GN104ID162_027708	PTTG_03056
GN104ID162_013797,GN104ID162_027707	PTTG_03057
GN104ID162_027704	PTTG_03058
GN104ID162_027702	PTTG_03059
GN104ID162_013826,GN104ID162_027669	PTTG_03070
GN104ID162_013827,GN104ID162_026742	PTTG_03071
GN104ID162_013828,GN104ID162_026741	PTTG_03072
GN104ID162_013832,GN104ID162_026738	PTTG_03073
GN104ID162_013833,GN104ID162_026737	PTTG_03074
GN104ID162_013834,GN104ID162_026736	PTTG_03075
GN104ID162_013835,GN104ID162_026735	PTTG_03076
GN104ID162_013838,GN104ID162_026732	PTTG_03077
GN104ID162_013841,GN104ID162_026729	PTTG_03078
GN104ID162_013845,GN104ID162_026725	PTTG_03079
GN104ID162_026713	PTTG_03080
GN104ID162_026699	PTTG_03083
GN104ID162_026696	PTTG_03084
GN104ID162_026694	PTTG_03086
GN104ID162_026693	PTTG_03087
GN104ID162_026692,GN104ID162_028366	PTTG_03088
GN104ID162_026691,GN104ID162_028367	PTTG_03089
GN104ID162_026679,GN104ID162_028379	PTTG_03091
GN104ID162_026677,GN104ID162_028381	PTTG_03092
GN104ID162_026673	PTTG_03093
GN104ID162_026672,GN104ID162_028385	PTTG_03094
GN104ID162_026670	PTTG_03095
GN104ID162_026667	PTTG_03096
GN104ID162_026666,GN104ID162_028394	PTTG_03097
GN104ID162_026664,GN104ID162_028396	PTTG_03098
GN104ID162_026662,GN104ID162_028398	PTTG_03099
GN104ID162_026660,GN104ID162_028400	PTTG_03100
GN104ID162_028402	PTTG_03101
GN104ID162_028408	PTTG_03103
GN104ID162_028409	PTTG_03104
GN104ID162_028232	PTTG_03105
GN104ID162_028236	PTTG_03106
GN104ID162_028239	PTTG_03108
GN104ID162_028247	PTTG_03110
GN104ID162_002611	PTTG_03116
GN104ID162_016652	PTTG_03117
GN104ID162_009585	PTTG_03122
GN104ID162_009584	PTTG_03123
GN104ID162_009572	PTTG_03125
GN104ID162_009570	PTTG_03126
GN104ID162_009569	PTTG_03127
GN104ID162_009550	PTTG_03131
GN104ID162_009549	PTTG_03132
GN104ID162_009548	PTTG_03133T1
GN104ID162_009543	PTTG_03134,PTTG_03134T1
GN104ID162_009538	PTTG_03137
GN104ID162_009535	PTTG_03139
GN104ID162_009528	PTTG_03142,PTTG_03142T1
GN104ID162_009527	PTTG_03143
GN104ID162_009525	PTTG_03144,PTTG_03144T1
GN104ID162_009524	PTTG_03145
GN104ID162_009519	PTTG_03149
GN104ID162_009510	PTTG_03150
GN104ID162_009508	PTTG_03151
GN104ID162_009499	PTTG_03155
GN104ID162_009494	PTTG_03157
GN104ID162_009489	PTTG_03158
GN104ID162_009484	PTTG_03162
GN104ID162_009482	PTTG_03163
GN104ID162_000410	PTTG_03167
GN104ID162_009472	PTTG_03168
GN104ID162_009471	PTTG_03170
GN104ID162_009465	PTTG_03172
GN104ID162_009463	PTTG_03173
GN104ID162_009455	PTTG_03175
GN104ID162_009449	PTTG_03181
GN104ID162_009448	PTTG_03182
GN104ID162_009445	PTTG_03184
GN104ID162_009444	PTTG_03185
GN104ID162_009442	PTTG_03186
GN104ID162_009441	PTTG_03187
GN104ID162_009440	PTTG_03188
GN104ID162_009431	PTTG_03193
GN104ID162_009426	PTTG_03194
GN104ID162_009421	PTTG_03195
GN104ID162_009414	PTTG_03197
GN104ID162_009412	PTTG_03198
GN104ID162_009411	PTTG_03199
GN104ID162_009406	PTTG_03200
GN104ID162_009404	PTTG_03201
GN104ID162_010450	PTTG_03209,PTTG_03209T1
GN104ID162_010472	PTTG_03210
GN104ID162_010475	PTTG_03211
GN104ID162_010477	PTTG_03212
GN104ID162_010489	PTTG_03215
GN104ID162_010499	PTTG_03217
GN104ID162_010511	PTTG_03220
GN104ID162_010517	PTTG_03222
GN104ID162_010527	PTTG_03225
GN104ID162_010543	PTTG_03227
GN104ID162_010561	PTTG_03232
GN104ID162_008226	PTTG_03237
GN104ID162_008221	PTTG_03238
GN104ID162_006991	PTTG_03241
GN104ID162_007001	PTTG_03242
GN104ID162_007005	PTTG_03244
GN104ID162_007006	PTTG_03245
GN104ID162_014698	PTTG_03248
GN104ID162_024142	PTTG_03250
GN104ID162_018915	PTTG_03253
GN104ID162_018925	PTTG_03259
GN104ID162_018937	PTTG_03263
GN104ID162_018939	PTTG_03265
GN104ID162_018940	PTTG_03266
GN104ID162_018954	PTTG_03268
GN104ID162_018958	PTTG_03269
GN104ID162_018960	PTTG_03270
GN104ID162_018965	PTTG_03271
GN104ID162_018969	PTTG_03272
GN104ID162_018971	PTTG_03273
GN104ID162_018986,GN104ID162_026038	PTTG_03275
GN104ID162_018990,GN104ID162_026034	PTTG_03276
GN104ID162_018992,GN104ID162_026032	PTTG_03277
GN104ID162_018996,GN104ID162_026029	PTTG_03278
GN104ID162_018998,GN104ID162_026026	PTTG_03279
GN104ID162_026016	PTTG_03282
GN104ID162_026014	PTTG_03283
GN104ID162_026013	PTTG_03284
GN104ID162_026007	PTTG_03287
GN104ID162_026004	PTTG_03288
GN104ID162_002041,GN104ID162_025989	PTTG_03298
GN104ID162_002043,GN104ID162_025987	PTTG_03299
GN104ID162_007444	PTTG_03302
GN104ID162_005550,GN104ID162_026430	PTTG_03306
GN104ID162_001615,GN104ID162_025617,GN104ID162_025649	PTTG_03307
GN104ID162_007429	PTTG_03308
GN104ID162_007421	PTTG_03309T2
GN104ID162_007417	PTTG_03310
GN104ID162_007416	PTTG_03311
GN104ID162_024367	PTTG_03314
GN104ID162_024378	PTTG_03316
GN104ID162_024379	PTTG_03319
GN104ID162_024381	PTTG_03320
GN104ID162_024382	PTTG_03321
GN104ID162_024385	PTTG_03322
GN104ID162_024388	PTTG_03324
GN104ID162_024392	PTTG_03325T1
GN104ID162_017762	PTTG_03333
GN104ID162_017744	PTTG_03340
GN104ID162_017734	PTTG_03346
GN104ID162_017732	PTTG_03347
GN104ID162_017724	PTTG_03351
GN104ID162_017721	PTTG_03352
GN104ID162_017720	PTTG_03353
GN104ID162_017718	PTTG_03354
GN104ID162_017715	PTTG_03355
GN104ID162_017714	PTTG_03356,PTTG_03356T1
GN104ID162_017686	PTTG_03361
GN104ID162_017676	PTTG_03363
GN104ID162_017671	PTTG_03366
GN104ID162_017669	PTTG_03367
GN104ID162_017665	PTTG_03369
GN104ID162_017664	PTTG_03370
GN104ID162_017657	PTTG_03371
GN104ID162_017654	PTTG_03372
GN104ID162_017645	PTTG_03375
GN104ID162_017644	PTTG_03376
GN104ID162_017636	PTTG_03378
GN104ID162_017631	PTTG_03379
GN104ID162_017628	PTTG_03381
GN104ID162_017626	PTTG_03382
GN104ID162_004367	PTTG_03390
GN104ID162_000687	PTTG_03401,PTTG_03401T1
GN104ID162_000692	PTTG_03403
GN104ID162_000695	PTTG_03404
GN104ID162_000697	PTTG_03405
GN104ID162_000755	PTTG_03406
GN104ID162_000756	PTTG_03407
GN104ID162_000705	PTTG_03408
GN104ID162_000717	PTTG_03412
GN104ID162_000728	PTTG_03416,PTTG_03416T1
GN104ID162_000731	PTTG_03422
GN104ID162_000738	PTTG_03425
GN104ID162_000744	PTTG_03428
GN104ID162_000747	PTTG_03429
GN104ID162_000748	PTTG_03430
GN104ID162_000749	PTTG_03431
GN104ID162_000767	PTTG_03432
GN104ID162_000768	PTTG_03433
GN104ID162_000769	PTTG_03434
GN104ID162_000772	PTTG_03435
GN104ID162_000773	PTTG_03436
GN104ID162_000774	PTTG_03437
GN104ID162_000775	PTTG_03438
GN104ID162_000776	PTTG_03439
GN104ID162_000778	PTTG_03441
GN104ID162_000779	PTTG_03442
GN104ID162_023760	PTTG_03443
GN104ID162_000811	PTTG_03444
GN104ID162_000812	PTTG_03445
GN104ID162_000816	PTTG_03446
GN104ID162_000823	PTTG_03448
GN104ID162_000827	PTTG_03451
GN104ID162_000840	PTTG_03453
GN104ID162_000842	PTTG_03454
GN104ID162_000843	PTTG_03455
GN104ID162_000845	PTTG_03456
GN104ID162_000846	PTTG_03457
GN104ID162_000847	PTTG_03458
GN104ID162_000849	PTTG_03459
GN104ID162_000853	PTTG_03460
GN104ID162_000857	PTTG_03462
GN104ID162_000866	PTTG_03465
GN104ID162_000867	PTTG_03468
GN104ID162_000873	PTTG_03469
GN104ID162_000876	PTTG_03470
GN104ID162_008779	PTTG_03471
GN104ID162_000888	PTTG_03472
GN104ID162_000891	PTTG_03474
GN104ID162_000893	PTTG_03475
GN104ID162_000906	PTTG_03477
GN104ID162_000910	PTTG_03478
GN104ID162_000913	PTTG_03481
GN104ID162_000914	PTTG_03482
GN104ID162_000917	PTTG_03483
GN104ID162_004019	PTTG_03484
GN104ID162_004024	PTTG_03489
GN104ID162_004027	PTTG_03490,PTTG_03490T2
GN104ID162_004030	PTTG_03491
GN104ID162_004042	PTTG_03492,PTTG_03492T1
GN104ID162_004057	PTTG_03495
GN104ID162_004059	PTTG_03496
GN104ID162_004061	PTTG_03497T1
GN104ID162_004076	PTTG_03499
GN104ID162_004080	PTTG_03500
GN104ID162_004084	PTTG_03501
GN104ID162_004085	PTTG_03502
GN104ID162_004086	PTTG_03503
GN104ID162_004088	PTTG_03505
GN104ID162_016999	PTTG_03506
GN104ID162_002035	PTTG_03508
GN104ID162_008572,GN104ID162_016619	PTTG_03509
GN104ID162_004107	PTTG_03510
GN104ID162_004110	PTTG_03511
GN104ID162_004112	PTTG_03512
GN104ID162_002108	PTTG_25688
GN104ID162_004114	PTTG_03513
GN104ID162_004117	PTTG_03515
GN104ID162_004118	PTTG_03516
GN104ID162_004119	PTTG_03517
GN104ID162_004123	PTTG_03518
GN104ID162_004129	PTTG_03520
GN104ID162_004131	PTTG_03521
GN104ID162_004132	PTTG_03522
GN104ID162_004133	PTTG_03523
GN104ID162_004134	PTTG_03524
GN104ID162_004135	PTTG_03525
GN104ID162_004144	PTTG_03528
GN104ID162_004145	PTTG_03529
GN104ID162_004148	PTTG_03531
GN104ID162_004151	PTTG_03532
GN104ID162_004152	PTTG_03535
GN104ID162_004158	PTTG_03536
GN104ID162_004159	PTTG_03538
GN104ID162_004160	PTTG_03539
GN104ID162_004163	PTTG_03540
GN104ID162_004164	PTTG_03541
GN104ID162_004166	PTTG_03542
GN104ID162_004169	PTTG_03543
GN104ID162_004180	PTTG_03545
GN104ID162_004184	PTTG_03546
GN104ID162_004185	PTTG_03547
GN104ID162_004187	PTTG_03548
GN104ID162_004197	PTTG_03552
GN104ID162_004202	PTTG_03553
GN104ID162_004204	PTTG_03554
GN104ID162_004207	PTTG_03556
GN104ID162_004211	PTTG_03559
GN104ID162_004212	PTTG_03560
GN104ID162_004213	PTTG_03561
GN104ID162_004217	PTTG_03562
GN104ID162_004218	PTTG_03563
GN104ID162_004219	PTTG_03564,PTTG_05738
GN104ID162_004220	PTTG_03565
GN104ID162_004223	PTTG_03566
GN104ID162_004225	PTTG_03567
GN104ID162_004236	PTTG_03569
GN104ID162_004238	PTTG_03570
GN104ID162_016566,GN104ID162_026990	PTTG_03574
GN104ID162_016571,GN104ID162_026995	PTTG_03576
GN104ID162_016573	PTTG_03577
GN104ID162_016578	PTTG_03579
GN104ID162_016581	PTTG_03582
GN104ID162_016584	PTTG_03584
GN104ID162_016585	PTTG_03585
GN104ID162_016587	PTTG_03586
GN104ID162_016589	PTTG_03587
GN104ID162_016592	PTTG_03588
GN104ID162_016602	PTTG_03592
GN104ID162_016606	PTTG_03594
GN104ID162_016607	PTTG_03595
GN104ID162_016609	PTTG_03596
GN104ID162_016610	PTTG_03597
GN104ID162_016611	PTTG_03598
GN104ID162_016612	PTTG_03599
GN104ID162_016616	PTTG_03601
GN104ID162_005299	PTTG_03609
GN104ID162_005301	PTTG_03610,PTTG_03610T4
GN104ID162_005308	PTTG_03614
GN104ID162_005309	PTTG_03615
GN104ID162_005316	PTTG_03621
GN104ID162_005323	PTTG_03624
GN104ID162_005324	PTTG_03625
GN104ID162_005325	PTTG_03626
GN104ID162_018303	PTTG_03628
GN104ID162_015864	PTTG_03629
GN104ID162_005340	PTTG_03631
GN104ID162_005344	PTTG_03635
GN104ID162_005356	PTTG_03639
GN104ID162_005358	PTTG_03640
GN104ID162_005362	PTTG_03643
GN104ID162_026581	PTTG_03644
GN104ID162_005371	PTTG_03648
GN104ID162_005372	PTTG_03649
GN104ID162_005373	PTTG_03650
GN104ID162_005375	PTTG_03651
GN104ID162_005384	PTTG_03652
GN104ID162_005385	PTTG_03653
GN104ID162_005390	PTTG_03654,PTTG_03654T1
GN104ID162_005394	PTTG_03656
GN104ID162_005395	PTTG_03657
GN104ID162_005397	PTTG_03658
GN104ID162_013402	PTTG_03663
GN104ID162_013399	PTTG_03664
GN104ID162_013397	PTTG_03665
GN104ID162_013395	PTTG_03666
GN104ID162_013393	PTTG_03667
GN104ID162_013392	PTTG_03668
GN104ID162_013391	PTTG_03669
GN104ID162_013390	PTTG_03670
GN104ID162_013389	PTTG_03671
GN104ID162_013386,GN104ID162_028692	PTTG_03672
GN104ID162_028697	PTTG_03673
GN104ID162_028699	PTTG_03675
GN104ID162_019277	PTTG_03685
GN104ID162_019279	PTTG_03686
GN104ID162_019283	PTTG_03687,PTTG_03687T1
GN104ID162_012042	PTTG_03689,PTTG_03689T1
GN104ID162_012046	PTTG_03690
GN104ID162_012048	PTTG_03691
GN104ID162_012052,GN104ID162_019305	PTTG_03693
GN104ID162_012061	PTTG_03694
GN104ID162_012063	PTTG_03695
GN104ID162_012071	PTTG_03697
GN104ID162_012074	PTTG_03698
GN104ID162_012078	PTTG_03700
GN104ID162_012086	PTTG_03704
GN104ID162_012089	PTTG_03705
GN104ID162_012099	PTTG_03707
GN104ID162_012102	PTTG_03708
GN104ID162_012108	PTTG_03709
GN104ID162_012110	PTTG_03711,PTTG_03711T1
GN104ID162_012116	PTTG_03712
GN104ID162_012118	PTTG_03714
GN104ID162_012121	PTTG_03715
GN104ID162_012131	PTTG_03716,PTTG_03716T1
GN104ID162_012133	PTTG_03718
GN104ID162_012151	PTTG_03721
GN104ID162_012152	PTTG_03722
GN104ID162_012153	PTTG_03723
GN104ID162_012157	PTTG_03724
GN104ID162_018416	PTTG_03731
GN104ID162_018415	PTTG_03732
GN104ID162_018413	PTTG_03733
GN104ID162_018410	PTTG_03735
GN104ID162_018403	PTTG_03737
GN104ID162_018400	PTTG_03739
GN104ID162_018399	PTTG_03740
GN104ID162_018392	PTTG_03742
GN104ID162_025083	PTTG_03744
GN104ID162_018381	PTTG_03745
GN104ID162_018380	PTTG_03746
GN104ID162_018374	PTTG_03749
[truncated: 8,512 more rows]
